# Supplementary material for: Effect of age and sex on efficacy and tolerability of β blockers in patients with heart failure with reduced ejection fraction: individual patient data meta-analysis
Source: PubMed Central journal article supplement — BMJ. 2016 Apr 20;353:i1855. doi: 10.1136/bmj.i1855 (PMC4849174; doi:10.1136/bmj.i1855), 2016-04-20

# Beta-Blockers in Heart Failure Collaborative Group

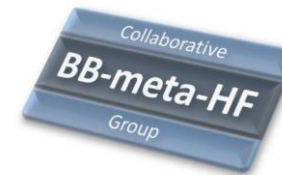

Data supplement

## **Effect of age and sex on efficacy and tolerability of $\beta$ blockers in patients with heart failure with reduced ejection fraction: individual patient data meta-analysis**

[Supplementary Table A: Baseline characteristics by sex](#)

[Supplementary Table B: Cause of death by age quartile](#)

[Supplementary Table C: Cause of death by sex](#)

[Supplementary Table D: All-cause mortality and hospital admission for heart failure according to treatment allocation and age](#)

[Supplementary Table E: Sensitivity analyses for all-cause mortality](#)

[Supplementary Table F: Beta-blocker discontinuation](#)

[Supplementary Table G: Study drug dosage](#)

[Supplementary Figure A: Distribution of patients by age and sex](#)

**Supplementary Table A: Baseline characteristics by sex**

| <b>Characteristic</b>                            | <b>Women<br/>n=3,283</b> | <b>Men<br/>n=10,550</b> |
|--------------------------------------------------|--------------------------|-------------------------|
| Age, median years (IQR)                          | 66 (58-73)               | 63 (55-71)              |
| Ischaemic heart failure aetiology, n (%)         | 1,994 (61%)              | 7,682 (73%)             |
| Prior myocardial infarction, n (%)               | 1,639 (50%)              | 6,644 63%               |
| Prior coronary revascularization, n (%)          | 425 (14%)                | 2,474 (25%)             |
| Diabetes Mellitus, n (%)                         | 912 (29%)                | 2,391 (24%)             |
| Years with heart failure diagnosis, median (IQR) | 3 (1-6)                  | 3 (1-6)                 |
| LVEF, median % (IQR)                             | 0.28 (0.21-0.34)         | 0.26 (0.20-0.32)        |
| NYHA class III/IV, n (%)                         | 2,226 (68%)              | 6,939 (66%)             |
| Systolic blood pressure, median mmHg (IQR)       | 128 (112-140)            | 121 (110-137)           |
| Diastolic blood pressure, median mmHg (IQR)      | 78 (70-83)               | 77 (70-82)              |
| Heart rate, median bpm (IQR)                     | 80 (73-88)               | 79 (72-88)              |
| Body mass index, median kg/m <sup>2</sup> (IQR)  | 27 (24-31)               | 27 (24-31)              |
| Estimated GFR, median mL/min (IQR)               | 58 (45-70)               | 65 (53-78)              |
| Any diuretic therapy, n (%)                      | 2, 863 (87%)             | 8,947 (85%)             |
| ACEi or ARB, n (%)                               | 3,089 (94%)              | 10,014 (95%)            |
| Aldosterone antagonists, n (%)                   | 286 (9%)                 | 782 (8%)                |
| Digoxin, n (%)                                   | 1,746 (54%)              | 5,456 (53%)             |

ACEi = angiotensin converting enzyme inhibitor; ARB = angiotensin receptor blocker; GFR = glomerular filtration rate; IQR = interquartile range; LVEF = left ventricular ejection fraction; NYHA = New York Heart Association.

**Supplementary Table B: Cause of death by age quartile**

| <b>Cause of death</b>          | <b>Quartile 1<br/>(youngest)</b> | <b>Quartile 2</b>          | <b>Quartile 3</b>          | <b>Quartile 4<br/>(oldest)</b> | <b>All ages</b>              |
|--------------------------------|----------------------------------|----------------------------|----------------------------|--------------------------------|------------------------------|
| Acute myocardial infarction    | 5%                               | 5%                         | 6%                         | 6%                             | 6%                           |
| Sudden death                   | 50%                              | 45%                        | 40%                        | 34%                            | 41%                          |
| Heart failure                  | 16%                              | 25%                        | 27%                        | 31%                            | 26%                          |
| Other cardiac                  | 3%                               | 4%                         | 2%                         | 2%                             | 3%                           |
| Stroke                         | 1%                               | 2%                         | 1%                         | 3%                             | 2%                           |
| Other vascular/thrombo-embolic | 5%                               | 5%                         | 5%                         | 4%                             | 5%                           |
| Non-cardiovascular             | 5%                               | 4%                         | 10%                        | 11%                            | 8%                           |
| Unknown                        | 13%                              | 11%                        | 10%                        | 10%                            | 11%                          |
| <b>Total deaths</b>            | <b>412/3,458<br/>(12%)</b>       | <b>510/3,590<br/>(14%)</b> | <b>581/3,327<br/>(17%)</b> | <b>687/3,458<br/>(20%)</b>     | <b>2190/13,833<br/>(16%)</b> |

**Supplementary Table C: Cause of death by sex**

| <b>Cause of death</b>          | <b>Women</b>               | <b>Men</b>                    |
|--------------------------------|----------------------------|-------------------------------|
| Acute myocardial infarction    | 6%                         | 5%                            |
| Sudden death                   | 41%                        | 41%                           |
| Heart failure                  | 25%                        | 26%                           |
| Other cardiac                  | 3%                         | 2%                            |
| Stroke                         | 3%                         | 2%                            |
| Other vascular/thrombo-embolic | 4%                         | 5%                            |
| Non-cardiovascular             | 7%                         | 8%                            |
| Unknown                        | 11%                        | 10%                           |
| <b>Total deaths</b>            | <b>462/3,283<br/>(14%)</b> | <b>1,728/10,550<br/>(16%)</b> |

**Supplementary Table D: All-cause mortality and hospital admission for heart failure according to treatment allocation and age**

| Age quartile          | <i>All-cause mortality during median follow-up period of 1.3 years (IQR 0.8-1.9)</i> |                          |                                                        | <i>Heart failure hospital admission during median follow-up period of 1.3 years (IQR 0.8-1.9)</i> |                          |                                                        |
|-----------------------|--------------------------------------------------------------------------------------|--------------------------|--------------------------------------------------------|---------------------------------------------------------------------------------------------------|--------------------------|--------------------------------------------------------|
|                       | Placebo                                                                              | Beta-blocker             | Absolute risk reduction / Number needed to treat (NNT) | Placebo                                                                                           | Beta-blocker             | Absolute risk reduction / Number needed to treat (NNT) |
| Quartile 1 (youngest) | 235/1,682 (14.0%)                                                                    | 177/1,776 (10.0%)        | 4.0% (NNT=25)                                          | 277/1,628 (17.0%)                                                                                 | 186/1,720 (10.8%)        | 6.2% (NNT=16)                                          |
| Quartile 2            | 278/1,744 (15.9%)                                                                    | 232/1,846 (12.6%)        | 3.4% (NNT=29)                                          | 330/1,715 (19.2%)                                                                                 | 256/1,814 (14.1%)        | 5.1% (NNT=20)                                          |
| Quartile 3            | 333/1,645 (20.2%)                                                                    | 248/1,682 (14.7%)        | 5.5% (NNT=18)                                          | 337/1,631 (20.7%)                                                                                 | 231/1,670 (13.8%)        | 6.8% (NNT=15)                                          |
| Quartile 4 (oldest)   | 376/1,702 (22.1%)                                                                    | 311/1,756 (17.7%)        | 4.4% (NNT=23)                                          | 328/1,702 (19.3%)                                                                                 | 287/1,756 (16.3%)        | 2.9% (NNT=34)                                          |
| <b>All ages</b>       | <b>1,222/6,773 (18.0%)</b>                                                           | <b>968/7,060 (13.7%)</b> | <b>4.3% (NNT=23)</b>                                   | <b>1,272/6,676 (19.1%)</b>                                                                        | <b>960/6,960 (13.8%)</b> | <b>5.3% (NNT=19)</b>                                   |

**Supplementary Table E: Sensitivity analyses for all-cause mortality**

| Analysis                                                       | Events/Patients | Beta-blockers versus placebo |         | Age interaction p-value | Sex interaction p-value |
|----------------------------------------------------------------|-----------------|------------------------------|---------|-------------------------|-------------------------|
|                                                                |                 | Hazard ratio, 95% CI         | p-value |                         |                         |
| Primary adjusted analysis                                      | 2,060/13,670    | 0.70, 0.64 to 0.77           | < 0.001 | 0.10                    | 0.84                    |
| Censor at 365 days                                             | 1,202/13,670    | 0.67, 0.59 to 0.75           | < 0.001 | 0.24                    | 0.40                    |
| Censor at 770 days                                             | 1,844/13,670    | 0.70, 0.63 to 0.76           | < 0.001 | 0.02                    | 0.87                    |
| Exclusion of BEST trial                                        | 1,439/11,650    | 0.64, 0.58 to 0.71           | < 0.001 | 0.02                    | 0.89                    |
| Exclusion of CAPRICORN trial                                   | 1,881/12,031    | 0.69, 0.63 to 0.76           | < 0.001 | 0.23                    | 0.96                    |
| Per protocol <sup>a</sup>                                      | 1,323/11,282    | 0.67, 0.60 to 0.75           | < 0.001 | 0.22                    | 0.89                    |
| LVEF ≤ 0.35                                                    | 1,882/11,568    | 0.70, 0.64 to 0.77           | < 0.001 | 0.12                    | 0.65                    |
| Additional adjustment for diabetes <sup>b</sup>                | 1,939/12,964    | 0.70, 0.64 to 0.77           | < 0.001 | 0.08                    | 0.66                    |
| Additional adjustment for digoxin use at baseline <sup>c</sup> | 2,058/13,378    | 0.70, 0.64 to 0.77           | < 0.001 | 0.09                    | 0.86                    |
| 2 stage <sup>c</sup> ; fixed effects                           | 2,058/13,378    | 0.71, 0.65 to 0.77           | < 0.001 | -                       | -                       |
| 2 stage <sup>c</sup> ; random effects <sup>d</sup>             | 2,058/13,378    | 0.69, 0.60 to 0.79           | < 0.001 | -                       | -                       |
| Crude unadjusted analysis                                      | 2,119/13,832    | 0.72, 0.66 to 0.78           | < 0.001 | 0.09                    | 0.81                    |
| Including entire age-range available; adjusted                 | 2,164/14,259    | 0.72, 0.66 to 0.78           | < 0.001 | 0.57                    | 0.76                    |
| All patients, regardless of rhythm/LVEF/age <sup>e</sup>       | 2,984/18,342    | 0.77, 0.71 to 0.82           | <0.001  | 0.19                    | 0.67                    |

<sup>a</sup> Excludes patients that discontinued study therapy. <sup>b</sup> Excludes the MDC and CIBIS-I trials. <sup>c</sup> Excludes the CHRISTMAS trial. <sup>d</sup> p-value for heterogeneity = 0.04, I<sup>2</sup> = 48%. <sup>e</sup> Post-hoc adjusted analysis of all patients irrespective of baseline heart rhythm, left-ventricular ejection fraction (LVEF) or age. All other sensitivity analyses were pre-defined (for details on study exclusions and analyses, see Design Paper: Kotecha D, Manzano L, Altman DG, et al.; Syst Rev. 2013;2:7).

**Supplementary Table F: Beta-blocker discontinuation**

| Discontinuation of beta-blockers     | Quartile 1<br>(youngest) |                | Quartile 2    |                | Quartile 3    |                | Quartile 4<br>(oldest) |                | All ages       |                |
|--------------------------------------|--------------------------|----------------|---------------|----------------|---------------|----------------|------------------------|----------------|----------------|----------------|
|                                      | Women                    | Men            | Women         | Men            | Women         | Men            | Women                  | Men            | Women          | Men            |
| - due to any adverse event           | 47<br>(14.0%)            | 167<br>(11.6%) | 51<br>(12.9%) | 183<br>(12.6%) | 59<br>(14.4%) | 186<br>(14.6%) | 86<br>(15.7%)          | 233<br>(19.3%) | 243<br>(14.4%) | 769<br>(14.3%) |
| - due to hypotension*                | 2<br>(0.9%)              | 8<br>(0.8%)    | 4<br>(1.4%)   | 14<br>(1.4%)   | 5<br>(1.6%)   | 12<br>(1.3%)   | 3<br>(0.7%)            | 13<br>(1.4%)   | 14<br>(1.1%)   | 47<br>(1.2%)   |
| - due to bradycardia*                |                          | 3<br>(0.3%)    | 2<br>(0.7%)   | 8<br>(0.8%)    | 3<br>(1.0%)   | 13<br>(1.5%)   | 3<br>(0.7%)            | 33<br>(3.5%)   | 8<br>(0.7%)    | 57<br>(1.5%)   |
| - due to heart failure exacerbation† | 17<br>(5.4%)             | 30<br>(2.2%)   | 13<br>(3.5%)  | 51<br>(3.7%)   | 8<br>(2.0%)   | 53<br>(4.4%)   | 18<br>(3.3%)           | 58<br>(4.9%)   | 56<br>(3.5%)   | 192<br>(3.7%)  |
| - due to renal impairment*           | 1<br>(0.5%)              | 4<br>(0.4%)    |               | 2<br>(0.2%)    |               | 5<br>(0.6%)    | 5<br>(1.2%)            | 5<br>(0.5%)    | 6<br>(0.5%)    | 16<br>(0.4%)   |
| - due to respiratory dysfunction*    | 1<br>(0.5%)              | 6<br>(0.6%)    | 3<br>(1.1%)   | 8<br>(0.8%)    | 3<br>(1.0%)   | 10<br>(1.1%)   | 2<br>(0.5%)            | 11<br>(1.2%)   | 9<br>(0.7%)    | 35<br>(0.9%)   |

\* Data not available for MERIT-HF, CIBIS-I and MDC. † Partial data for CIBIS-I and MDC.

**Supplementary Table G: Study drug dosage**

| Sex   | Mean beta-blocker dosage as a percentage of maximal dose for that study* |            |            |                        |            |
|-------|--------------------------------------------------------------------------|------------|------------|------------------------|------------|
|       | Quartile 1<br>(youngest)                                                 | Quartile 2 | Quartile 3 | Quartile 4<br>(oldest) | All ages   |
| Women | 72%                                                                      | 71%        | 73%        | 75%                    | <b>73%</b> |
| Men   | 76%                                                                      | 74%        | 71%        | 70%                    | <b>73%</b> |

Data not available for BEST and CHRISTMAS; partial data for other trials (n=1,187 for women and n=3,646 for men randomized to beta-blockers). \* Achieved at the interim time point for study in patients receiving therapy (median 172 days [IQR 112-198] from randomization).



### Supplementary Figure A: Distribution of patients by age and sex

Frequency histograms for age distribution in men and women (LVEF <0.45 in sinus rhythm; age 40-85).

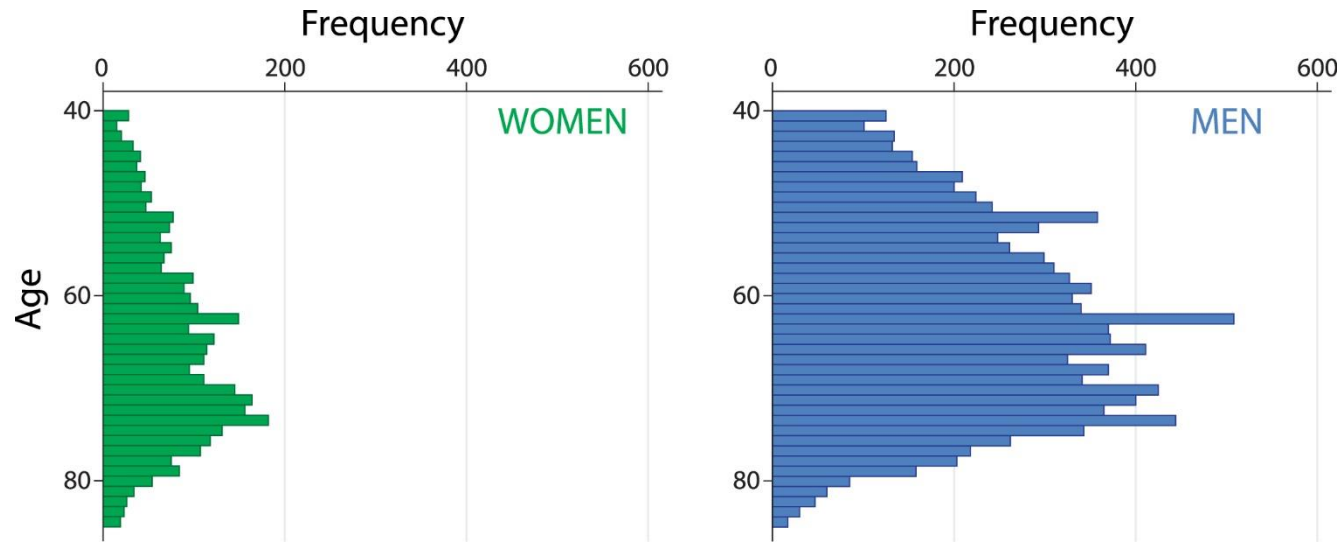

Supplement: kotd030418.ww1_default.pdf [file kotd030418.ww1_default.pdf]
